# Supplementary material for: Long-Term Humoral Immune Response against SARS-CoV-2 after Natural Infection and Subsequent Vaccination According to WHO International Binding Antibody Units (BAU/mL)
Source: MDPI journal article supplement (doi:10.3390/v13122336), 2021-11-23

Mediagnost anti-SARS-CoV-2 S1 RBD human IgA  
Exemplary response curve WHO NIBSC 20/136

Concentration 20/136 Optical Density 450-620nm

| BAU/mL | Blank corrected, arbitrary Units |
|--------|----------------------------------|
| 0,000  | 0                                |
| 0.078  | 0.316                            |
| 0.156  | 0.599                            |
| 0.312  | 1.049                            |
| 0.625  | 1.712                            |
| 1.250  | 2.544                            |
| 2.500  | 3.474                            |

|                              | corresponding BAU/mL |       |       |
|------------------------------|----------------------|-------|-------|
| Negative Control (1:201dil.) | 0.224                | 0.045 | 9.045 |
| 5 x NC - cut off             | 1.120                | 0.346 | 69.55 |

| Curve Formula       | Parameter           | Value  | Std. Error | 95% CI min | 95% CI max |    |
|---------------------|---------------------|--------|------------|------------|------------|----|
| Y=D*X^3+C*X^2+B*X+A | A                   | 0,0636 | 0,0278     | -0,0561    | 0,183      |    |
|                     | B                   | 3,6    | 0,149      | 2,96       | 4,24       |    |
|                     | C                   | -1,7   | 0,164      | -2,4       | -0,989     |    |
|                     | D                   | 0,321  | 0,0442     | 0,13       | 0,511      |    |
| Curve Name          | Curve Formula       | A      | B          | C          | D          | R2 |
| StdCurve            | Y=D*X^3+C*X^2+B*X+A | 0,0636 | 3,6        | -1,7       | 0,321      | 1  |

Mediagnost anti-S1 RBD IgA  
Test vom 15.06.2021, JE

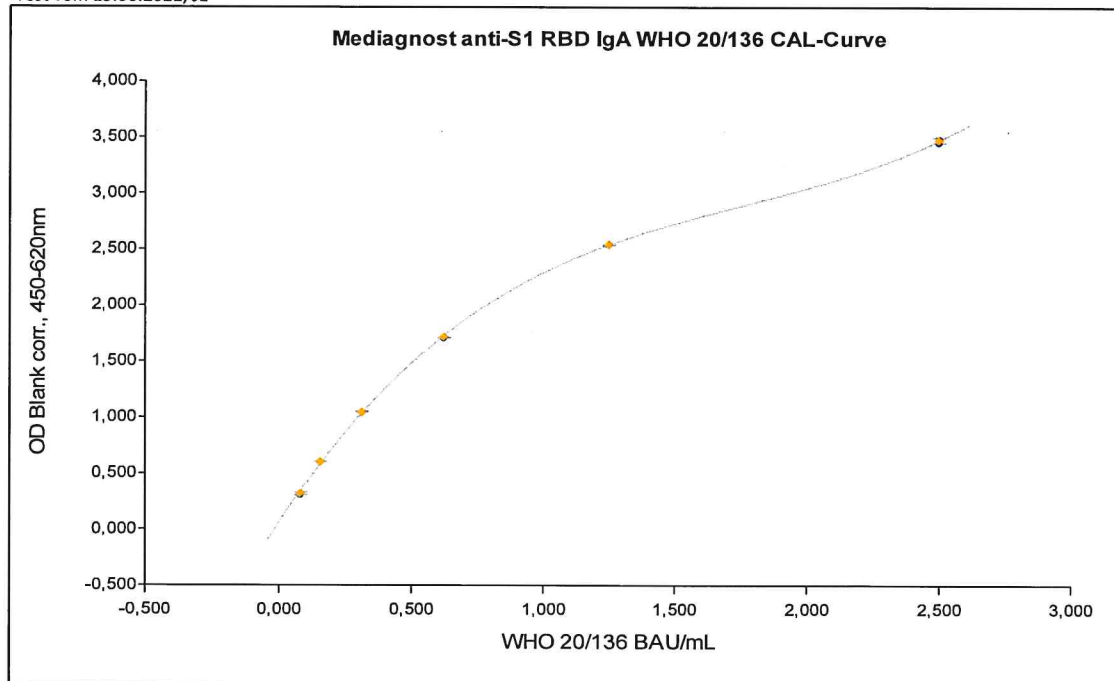

Supplemental Data - Manuscript ID: viruses-1369783

Mediagnost anti-SARS-CoV-2 S1 RBD human IgG

Exemplary response curve WHO NIBSC 20/136

Concentration 20/136 Optical Density 450-620nm

Blank corrected, arbitrary

BAU/mL Units

|       |       |
|-------|-------|
| 0     | 0     |
| 0.078 | 0.193 |
| 0.156 | 0.384 |
| 0.312 | 0.735 |
| 0.625 | 1.310 |
| 1.250 | 1.971 |
| 2.500 | 2.698 |

corresponding BAU/mL calculated final conc. BAU/mL

|                              |       |       |        |
|------------------------------|-------|-------|--------|
| Negative Control (1:201dil.) | 0,124 | 0.050 | 10.045 |
| 5 x NC - cut off             | 0.620 | 0.255 | 51.264 |

| Curve Formula       | Parameter | Value   | Std. Error | 95% CI min | 95% CI max |
|---------------------|-----------|---------|------------|------------|------------|
| Y=D*X^3+C*X^2+B*X+A | A         | -0,0116 | 0,00875    | -0,0394    | 0,0163     |
|                     | B         | 2,77    | 0,0539     | 2,6        | 2,94       |
|                     | C         | -1,22   | 0,0636     | -1,42      | -1,02      |
|                     | D         | 0,218   | 0,0176     | 0,161      | 0,274      |
| Curve Formula       | A         | B       | C          | D          | R2         |
| Y=D*X^3+C*X^2+B*X+A | -0,0116   | 2,77    | -1,22      | 0,218      | 1          |

Mediagnost anti-S1 RBD IgG

Test vom 23.02.2021, MR

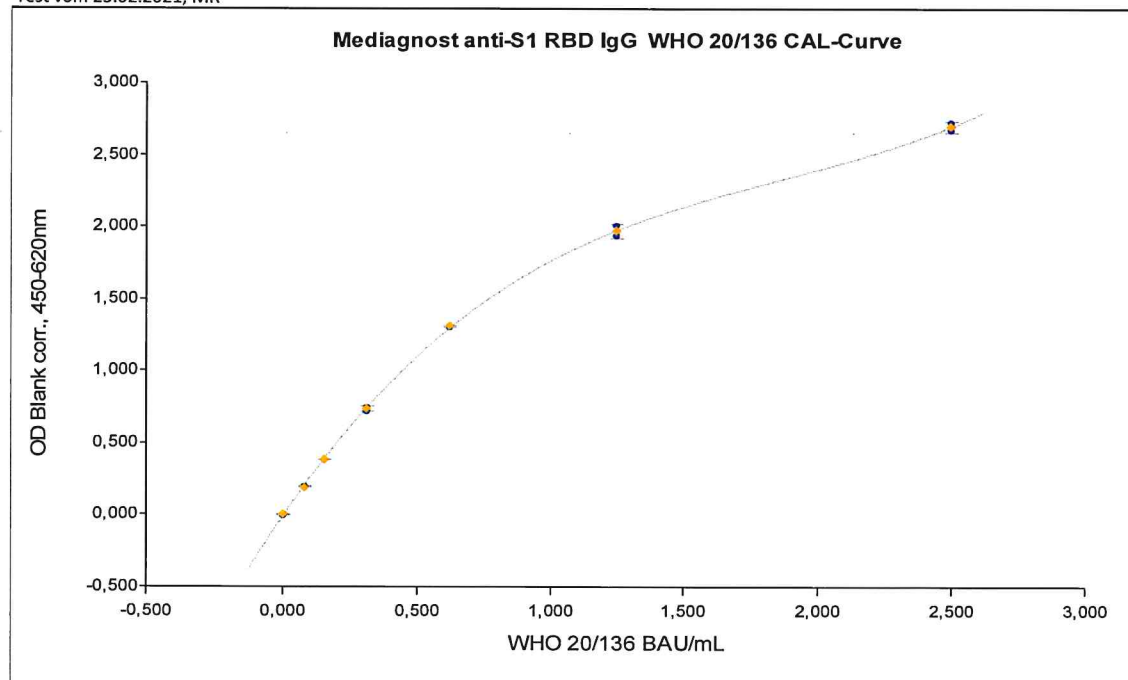

Mediagnost anti-SARS-CoV-2 N human IgA  
Exemplary response curve WHO NIBSC 20/136

Concentration 20/136 Optical Density 450-620nm  
Blank corrected, arbitrary

| BAU/mL | Units |
|--------|-------|
| 0,000  | 0     |
| 0.312  | 0.143 |
| 0.625  | 0.296 |
| 1.250  | 0.543 |
| 2.500  | 1.137 |
| 5.000  | 1.931 |
| 10.000 | 2.838 |

|                              | 0.118 | 0.259 | 52.059  |
|------------------------------|-------|-------|---------|
| Negative Control (1:201dil.) |       |       |         |
| 5 x NC - cut off             | 0.590 | 1.275 | 256.275 |

corresponding BAU/mL calculated final conc. BAU/mL

| Curve Formula | Parameter | Value    | Std. Error | 95% CI min | 95% CI max |
|---------------|-----------|----------|------------|------------|------------|
| Y=C*X^2+B*X+A | A         | -0,00883 | 0,0164     | -0,0545    | 0,0368     |
|               | B         | 0,496    | 0,0115     | 0,464      | 0,528      |
|               | C         | -0,0212  | 0,00113    | -0,0243    | -0,0181    |

| Curve Formula | A        | B     | C       | R2 |
|---------------|----------|-------|---------|----|
| Y=C*X^2+B*X+A | -0,00883 | 0,496 | -0,0212 | 1  |

Mediagnost anti-N IgA  
Test vom 23.02.2021, MR

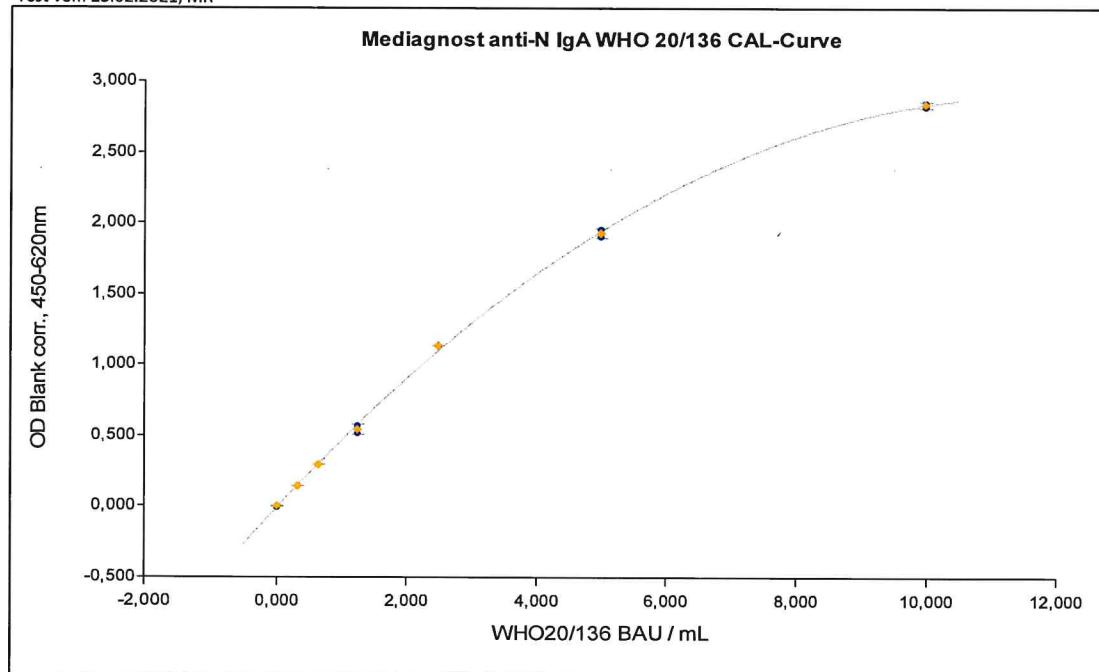

**Supplemental Data - Manuscript ID: viruses-1369783**  
**Mediagnost anti-SARS-CoV-2 N human IgG**  
**Exemplary response curve WHO NIBSC 20/136**

| Concentration 20/136       | Optical Density 450-620nm |
|----------------------------|---------------------------|
| Blank corrected, arbitrary |                           |
| BAU/mL                     | Units                     |
| 0                          | 0                         |
| 0.039                      | 0.227                     |
| 0.078                      | 0.447                     |
| 0.156                      | 0.778                     |
| 0.312                      | 1.252                     |
| 0.625                      | 1.983                     |

|                              |       | corresponding BAU/mL calculated final conc. BAU/mL |        |
|------------------------------|-------|----------------------------------------------------|--------|
| Negative Control (1:201dil.) | 0.178 | 0.029                                              | 5.763  |
| 5 x NC - cut off             | 0.89  | 0.194                                              | 39.027 |

| Curve Formula | Parameter | Value  | Std. Error | 95% CI min | 95% CI max |
|---------------|-----------|--------|------------|------------|------------|
| Y=C*X^2+B*X+A | A         | 0,0382 | 0,0339     | -0,0698    | 0,146      |
|               | B         | 4,97   | 0,345      | 3,87       | 6,07       |
|               | C         | -2,99  | 0,528      | -4,67      | -1,31      |

| Curve Formula | A      | B    | C     | R2    |
|---------------|--------|------|-------|-------|
| Y=C*X^2+B*X+A | 0,0382 | 4,97 | -2,99 | 0,998 |

Mediagnost anti-N IgG  
 Test vom 24.02.2021, MR

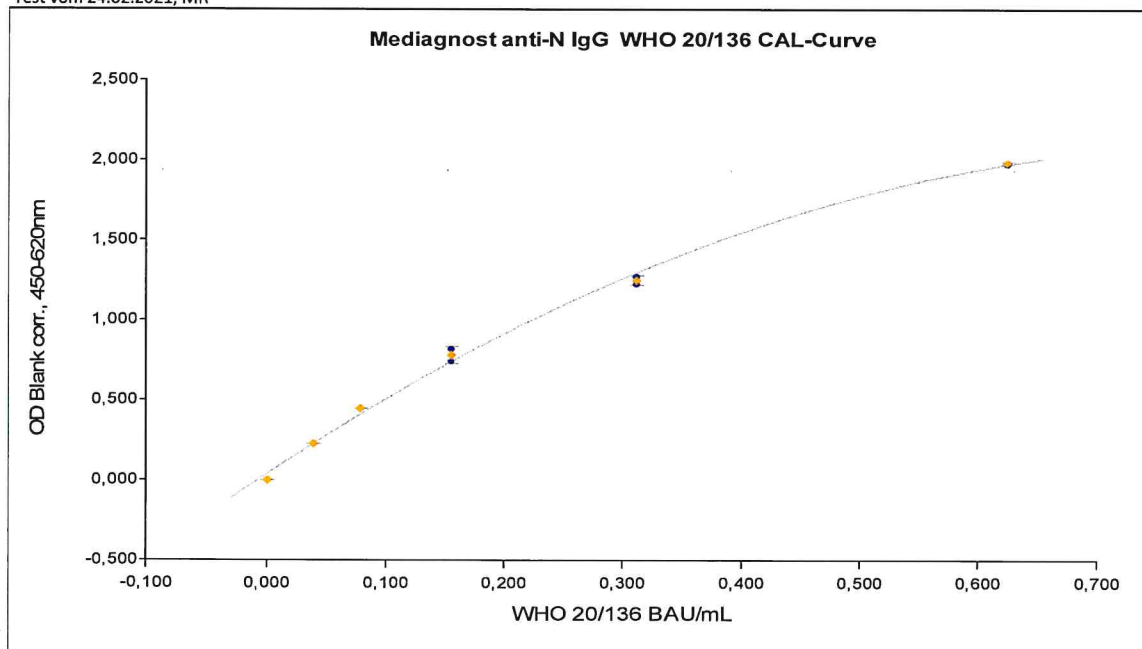

Supplement: s1 [file s1]
